# Supplementary material for: Decoupling Strategy for Enhanced Syngas Generation from Photoelectrochemical CO2 Reduction
Source: PubMed Central journal article supplement — iScience. 2020 Jul 20;23(8):101390. doi: 10.1016/j.isci.2020.101390 (PMC7398975; doi:10.1016/j.isci.2020.101390), 2020-07-20
Supplement: mmc1.pdf [file mmc1.pdf]

**iScience, Volume 23**

**Supplemental Information**

**Decoupling Strategy**

**for Enhanced Syngas Generation**

**from Photoelectrochemical CO<sub>2</sub> Reduction**

**Sheng Chu, Pengfei Ou, Roksana Tonny Rashid, Pegah Ghamari, Renjie Wang, Hong Nhung Tran, Songrui Zhao, Huiyan Zhang, Jun Song, and Zetian Mi**

## Transparent Methods

**Density functional theory (DFT) calculations:** DFT calculations were performed with BEEF-vdW (Wellendorff et al., 2012) exchange-correlation functional and projector augmented wave (PAW) pseudopotential (Blöchl, 1994; Kresse and Joubert, 1999) within the Vienna Ab-initio Simulation Package (VASP) (Kresse and Hafner, 1994; Kresse and Furthmüller, 1996). A cut-off energy of 400 eV was chosen, and structural optimization were achieved until the residual force on each atom was smaller than  $0.01 \text{ eV } \text{Å}^{-1}$ . A  $(3 \times 3)$  and  $(3 \times 1)$  surface unit with a four-layer slab were modeled for the (111) and (211) facets of fcc metals respectively, both containing 9 surface metal atoms per supercell. All slabs were spaced more than  $20 \text{ Å}$  perpendicular to the slab surface to avoid interaction due to their periodicity. A  $4 \times 4 \times 1$  Monkhorst-Pack mesh of k-points (Monkhorst and Pack, 1976) was used both for (111) and (211) facets. When relaxing the geometries, adsorbates and the top two layers were allowed to relax, while the bottom two layers were fixed to their initial bulk positions.

The reaction mechanism of  $\text{CO}_2$  reduction to CO in an aqueous solution is suggested to include the following steps (Sheng et al., 2017):

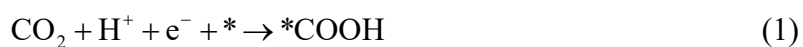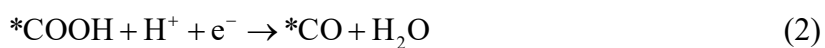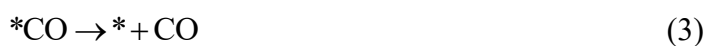

where \* denotes either a surface-bound species or a vacant catalytic active site.

The HER consists of two consecutive proton-electron pair transfer steps:

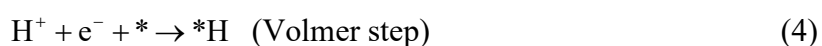

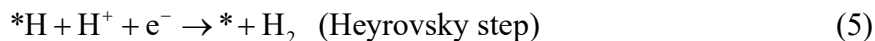

or

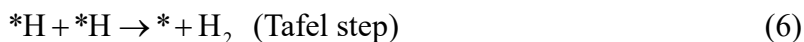

**Free energy corrections for adsorbates and gas molecules:** The CO<sub>2</sub>RR and HER activity maps were calculated by computational hydrogen electrode (CHE) model suggested by Nørskov et al (Nørskov et al., 2004). By employing the CHE model, a proton/electron (H<sup>+</sup> + e<sup>-</sup>) in solution can be directly treated and the effect of a bias can be applied by shifting by  $\Delta G$  by  $+neU$ , where  $n$  is the number of proton-electron pairs transferred,  $e$  is the elementary positive charge, and  $U$  is the applied potential. The free energy change ( $\Delta G$ ) is calculated as  $\Delta G = \Delta E + \Delta ZPE + \int C_p dT - T\Delta S$ , where  $\Delta E$  is the total energy directly obtained from DFT calculations,  $\Delta ZPE$  is the change in zero-point energy,  $C_p$  is the heat capacity,  $T$  is temperature, and  $\Delta S$  is the change in entropy. The temperature is set to 298.15 K to compare current DFT results with the experimental data. The contributions to the free energy for each adsorbate involved in the lowest-energy pathways are listed in Table S1. As indicated in a previous study (Tripković et al., 2010), the reaction intermediates would be stabilized by the hexagonal water overlayer above them, therefore the solvation correction was also employed by applying a  $*COOH$  and  $*CO$  stabilization of 0.25 and 0.1 eV, respectively.

DFT calculations of non-adsorbed species were performed using the same techniques as described above for adsorbed species, except with a Fermi-level smearing of 0.01 eV. The components of the energy calculations for all non-adsorbed species are also listed in Table S1.

**Sample synthesis:** GaN nanowire arrays were grown on planar p-n Si wafer by plasma-assisted molecular beam epitaxy as previously described (Vanka et al., 2018). Au nanoparticles were deposited on GaN nanowires using an e-beam evaporator at a deposition rate of 0.1 Å/s for 500 s, followed with thermal annealing in Ar at 650 °C for 2 min. During the annealing process, small Au nanoparticles migrated and coalesced to form large Au nanoparticles on GaN nanowires for decreasing the surface energy (Sui et al., 2013). Au was favourable to grow on the *c*-plane of GaN nanowires as a tipped heterostructure. This can be explained by the smaller formation energy for Au on *c*-plane GaN, partly due to the smaller lattice mismatch between Au(111) and *c*-plane GaN compared to *m*-plane GaN (0.24, 0.26 and 0.28 nm, respectively) (Li et al., 2014). Prior to the Au e-beam deposition, the GaN nanowires on p-n Si substrate was pre-treated with concentrated HCl solution for 30 s to remove native oxide. Pt nanoparticles were deposited on GaN nanowires by photodeposition using H<sub>2</sub>PtCl<sub>6</sub> (99.9%, Sigma Aldrich) as precursor from an aqueous methanol solution (15 mL methanol and 60 mL deionized water). 2, 5 and 12 μL of 0.2 M H<sub>2</sub>PtCl<sub>6</sub> were used for the preparation of AuPt<sub>0.1</sub>/GaN/n<sup>+</sup>-p Si, AuPt<sub>0.2</sub>/GaN/n<sup>+</sup>-p Si and AuPt<sub>0.4</sub>/GaN/n<sup>+</sup>-p Si, respectively. NiFeO<sub>x</sub>/BiVO<sub>4</sub> photoanode was prepared according to a previously reported method (Kim and Choi, 2014; Kobayashi et al., 2018).

**Characterization:** ICP-AES analyses were performed on a Thermo Scientific iCAP 6000 Series inductively coupled plasma–atomic emission spectroscopy instrument to determine the loading amount of metal cocatalysts. The samples were digested in aqua regia (HNO<sub>3</sub>:HCl=1:3) at 95 °C for 3 h before the analysis. The morphology of samples was characterized by SEM and TEM. SEM images were acquired from an Inspect F-50 FE-SEM system at an accelerating

voltage of 5 keV. TEM images were attained on FEI Tecnai G2 F20 microscope at 200 keV, with EDX attached. The nanowires were scratched off from the Si substrate onto a Cu TEM grid. Surface chemical compositions of samples were analyzed by XPS in a Thermo Scientific K-Alpha XPS system with a monochromatic Al K $\alpha$  source ( $h\nu = 1486.6$  eV). The binding energies were calibrated using the C1s peak at 284.8 eV as the reference.

**PEC measurements:** PEC CO<sub>2</sub> reduction was performed in a three-electrode configuration with AuPt<sub>x</sub>/GaN/n<sup>+</sup>-p Si as the working electrode, Pt wire as the counter electrode and Ag/AgCl as the reference electrode. The gastight PEC reactor has three compartments, including working compartment, reference compartment, and counter compartment. The compartments were separated by proton exchange membranes. Prior to PEC CO<sub>2</sub> reduction experiments, 40 mL electrolyte of 0.5 M KHCO<sub>3</sub> was added into the cell and purged with CO<sub>2</sub> for 30 min, resulting in electrolyte pH at 7.5. The light source was a solar simulator (Newport Oriel LCS-100) with a calibrated light intensity of 100 mW cm<sup>-2</sup> (1 sun) on the sample surface. The PEC data were collected by a potentiostat (Gamry Instruments, Interface 1000). The  $J$ - $V$  curve was obtained at a scan rate of 20 mV/s. Chronoamperometry for product analysis was performed at a certain potential for 100 min. Gas products after the photoelectrolysis were analysed by a gas chromatograph (Shimadzu GC-8A) with a thermal conductivity detector for H<sub>2</sub> concentration, and a gas chromatograph (Shimadzu GC-2014) with a flame ionization detector for CO and hydrocarbons concentration. Each measurement was performed several times to check the consistency of experiments. The average values out of the multiple measurements were presented and error bars denote one standard deviation.

The applied bias photon-to-current efficiency (ABPE) was calculated using the following equation:

$$ABPE(\%) = \left[ \frac{J(\text{mA} \cdot \text{cm}^{-2}) \times FE_{\text{CO}}(\%) \times (1.34 - V_{\text{bias}})(V) + J(\text{mA} \cdot \text{cm}^{-2}) \times FE_{\text{H}_2}(\%) \times (1.23 - V_{\text{bias}})(V)}{P_{\text{in}}(\text{mW} \cdot \text{cm}^{-2})} \right] \quad (7)$$

where  $J$  is the photocurrent density,  $FE_{\text{CO}}$  and  $FE_{\text{H}_2}$  are faradaic efficiency to produce CO and H<sub>2</sub> respectively,  $V_{\text{bias}}$  is the applied potential versus an ideal counter electrode for O<sub>2</sub> evolution (+1.23 V vs. RHE), and  $P_{\text{in}}$  is the light intensity (100 mW cm<sup>-2</sup>).

The unassisted overall solar-to-syngas (STS) efficiency  $\eta_{\text{STS}}$  was calculated using the following equation:

$$\eta_{\text{STS}}(\%) = \left[ \frac{J(\text{mA} \cdot \text{cm}^{-2}) \times FE_{\text{CO}}(\%) \times 1.34(V) + J(\text{mA} \cdot \text{cm}^{-2}) \times FE_{\text{H}_2}(\%) \times 1.23(V)}{P_{\text{in}}(\text{mW} \cdot \text{cm}^{-2})} \right] \quad (8)$$

where  $J$  is the unbiased photocurrent density measured in a two-electrode cell.

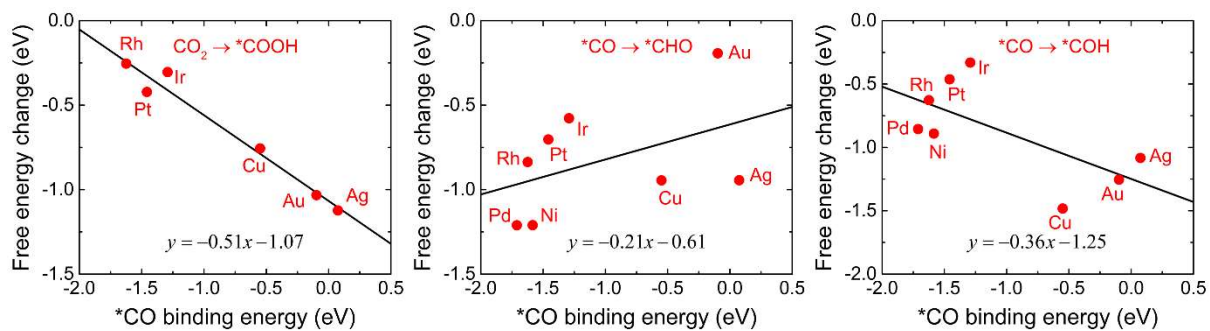

**Figure S1.** Scaling relations between the \*CO binding energy and basic reactions in CO<sub>2</sub>RR on transition metal fcc(111) facet. The fitted equations are shown in the insets. Related to Figure 1.

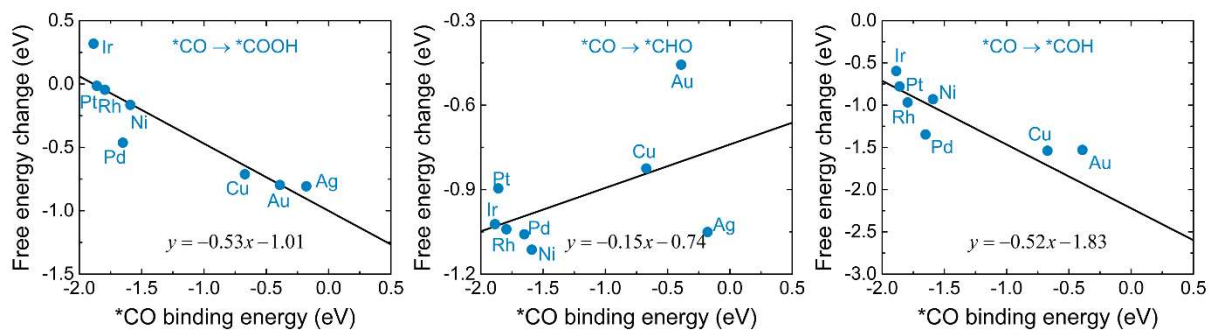

**Figure S2.** Scaling relations between the \*CO binding energy and basic reactions in CO<sub>2</sub>RR on transition metal fcc(211) facet. The fitted equations are shown in the insets. Related to Figure 1.



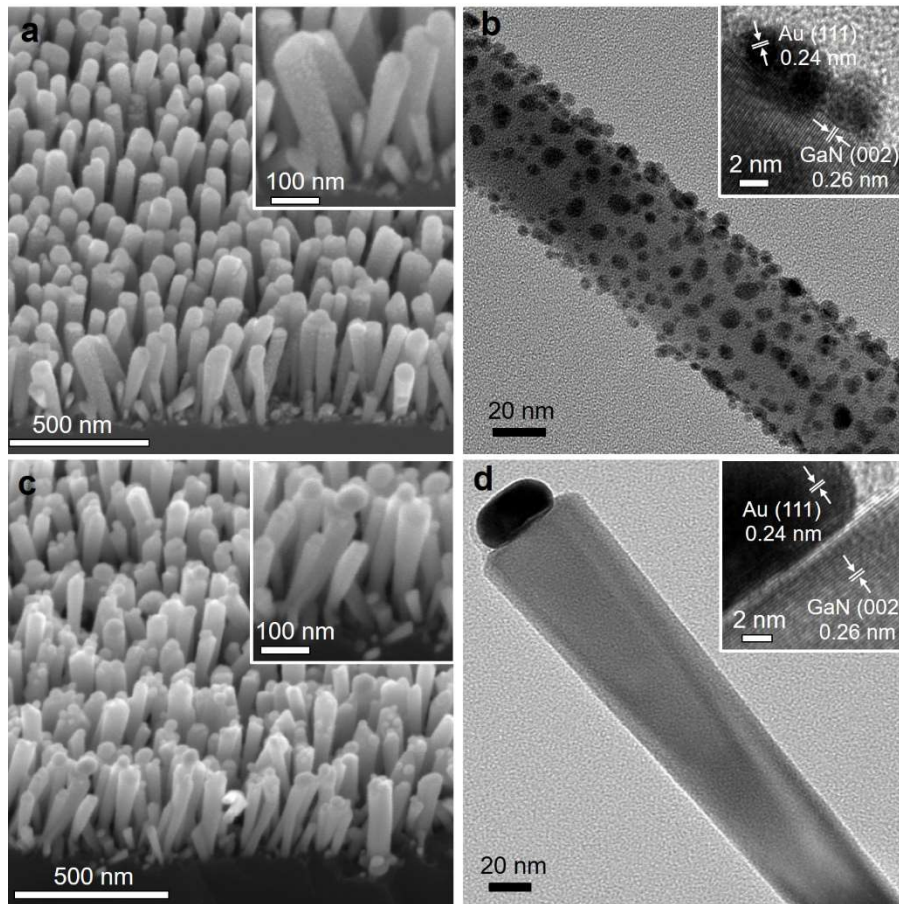

**Figure S3.** SEM and TEM images of Au/GaN/n<sup>+</sup>-p Si before (a, b) and after (c, d) annealing process. Related to Figure 2.

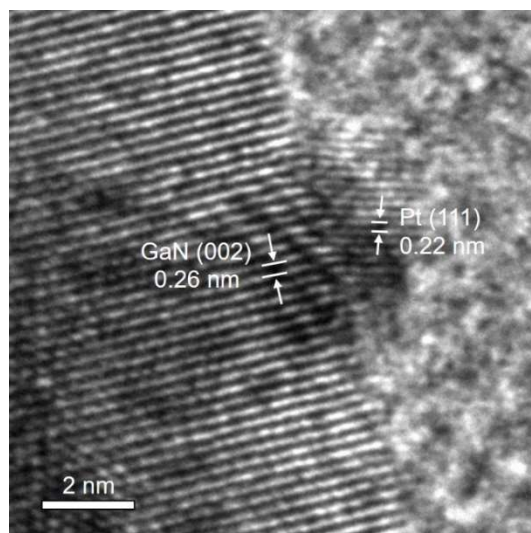

**Figure S4.** High-resolution TEM image of Pt nanoparticle on GaN nanowire. Related to Figure 2.

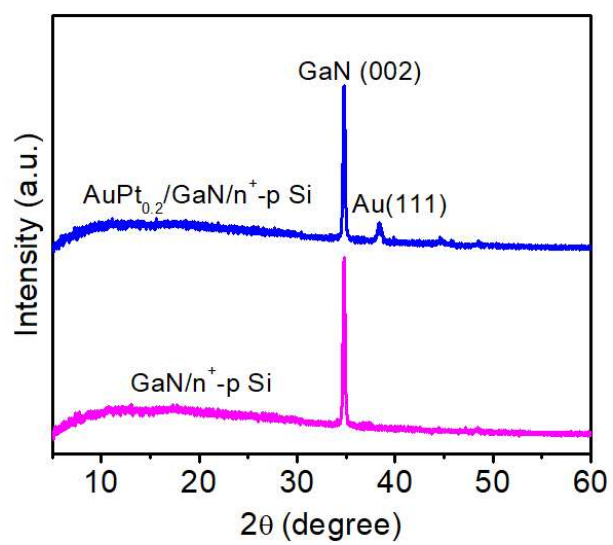

**Figure S5.** XRD patterns of GaN/n<sup>+</sup>-p Si and AuPt<sub>0.2</sub>/GaN/n<sup>+</sup>-p Si. Related to Figure 2.

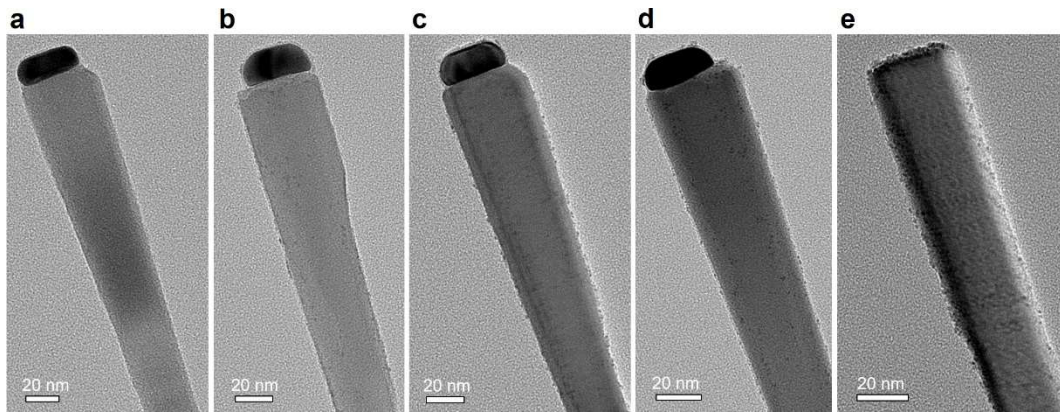

**Figure S6.** TEM images of (a) Au/GaN/n<sup>+</sup>-p Si, (b) AuPt<sub>0.1</sub>/GaN/n<sup>+</sup>-p Si, (c) AuPt<sub>0.2</sub>/GaN/n<sup>+</sup>-p Si, (d) AuPt<sub>0.4</sub>/GaN/n<sup>+</sup>-p Si and (e) Pt/GaN/n<sup>+</sup>-p Si. Related to Figure 2.

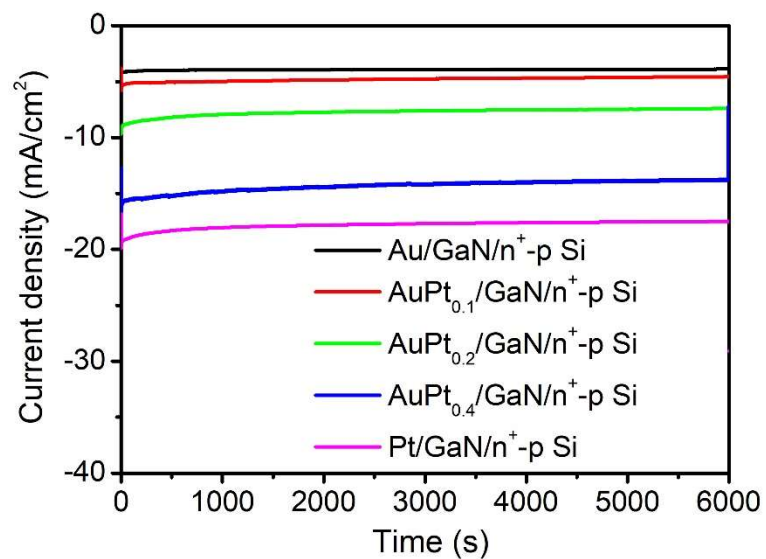

**Figure S7.** Chronoamperometry data of AuPt<sub>x</sub>/GaN/n<sup>+</sup>-p Si photocathodes at +0.17 V vs RHE in CO<sub>2</sub>-saturated 0.5 M KHCO<sub>3</sub> (pH 7.5) under AM 1.5G one-sun illumination. Related to Figure 3.

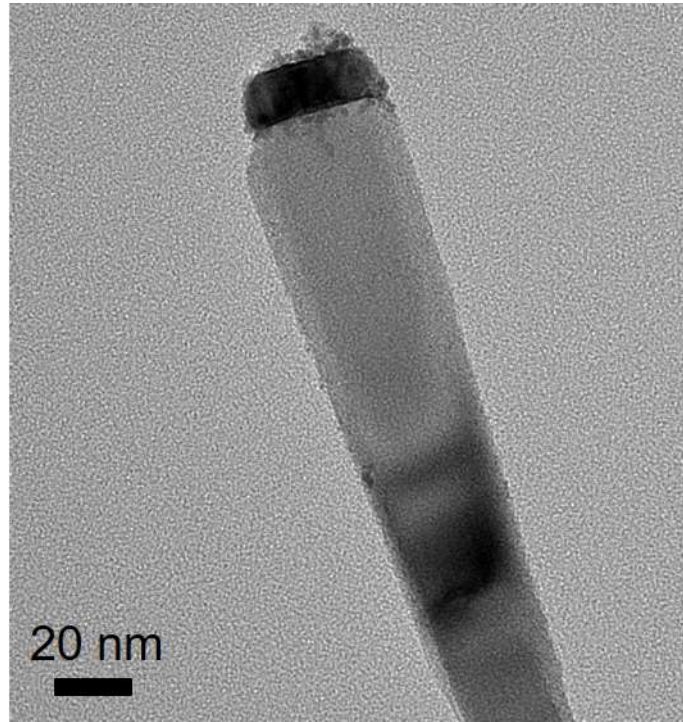

**Figure S8.** TEM image of AuPt<sub>0.1</sub>/GaN/n<sup>+</sup>-p Si using Pt(NH<sub>3</sub>)<sub>4</sub>Cl<sub>2</sub> as Pt precursor. Related to Figure 3.

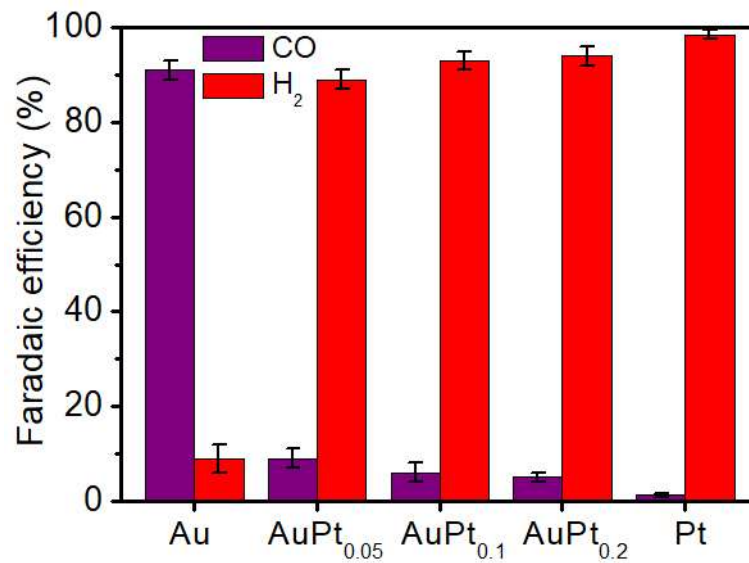

**Figure S9.** FEs for CO (purple bars) and H<sub>2</sub> (red bars) of AuPt<sub>x</sub>/GaN/n<sup>+</sup>-p Si with different cocatalyst compositions at +0.17 V vs RHE using Pt(NH<sub>3</sub>)<sub>4</sub>Cl<sub>2</sub> as Pt precursor. Error bars represent one standard deviation of multiple independent measurements. Related to Figure 3.

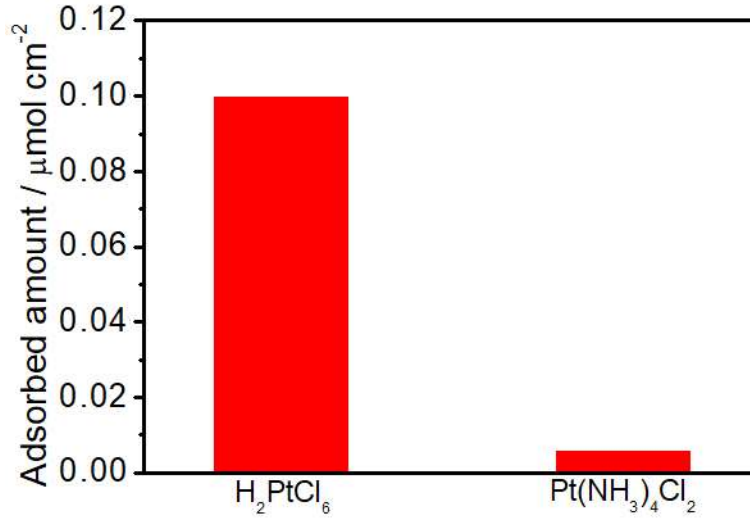

**Figure S10.** The adsorption amount of Pt precursor on Au/GaN/n<sup>+</sup>-p Si sample. 3 cm<sup>2</sup> of wafer sample was immersed in 50 mL H<sub>2</sub>PtCl<sub>6</sub> or Pt(NH<sub>3</sub>)<sub>4</sub>Cl<sub>2</sub> aqueous solution (0.01 mmol/L) overnight. The Pt concentration in the solution was analyzed by ICP-AES, and the adsorbed Pt amount was calculated. The results show the stronger adsorption of PtCl<sub>6</sub><sup>2-</sup> than that of Pt(NH<sub>3</sub>)<sub>4</sub><sup>2+</sup>. Related to Figure 3.



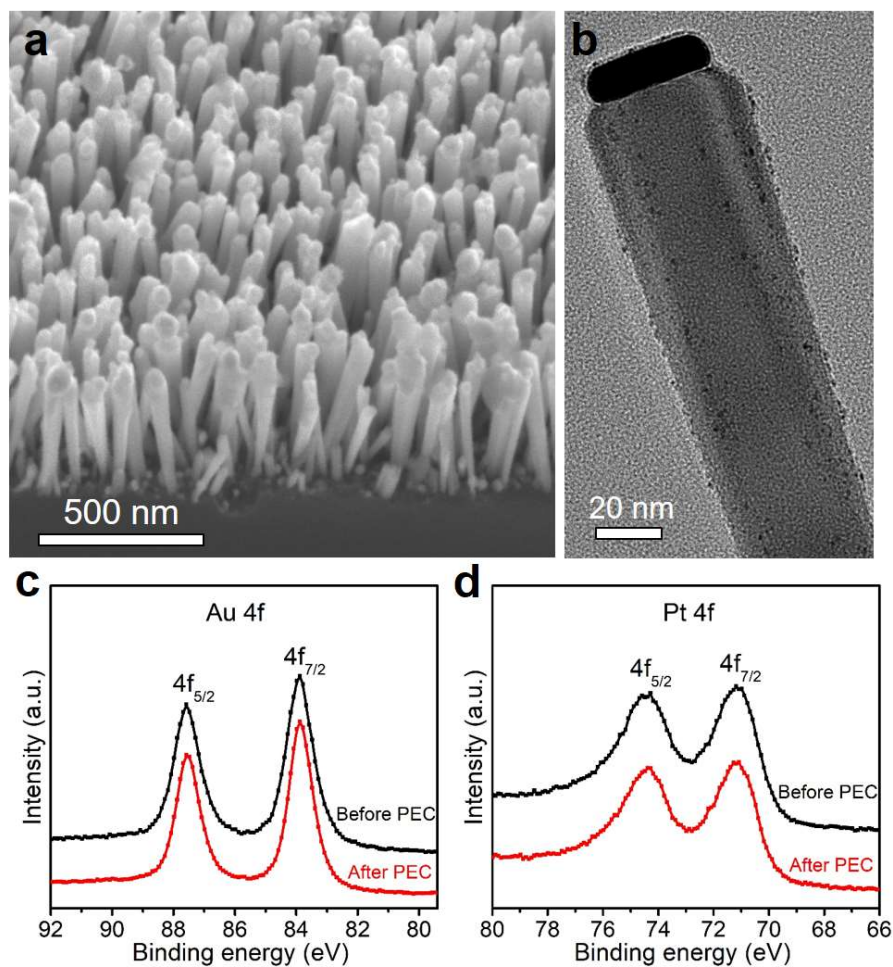

**Figure S11.** (a) SEM and (b) TEM images of AuPt<sub>0.2</sub>/GaN/n<sup>+</sup>-p Si photocathode after PEC stability test. XPS analysis of (c) Au 4f and (d) Pt 4f of AuPt<sub>0.2</sub>/GaN/n<sup>+</sup>-p Si photocathode before and after PEC stability test. Related to Figure 3.

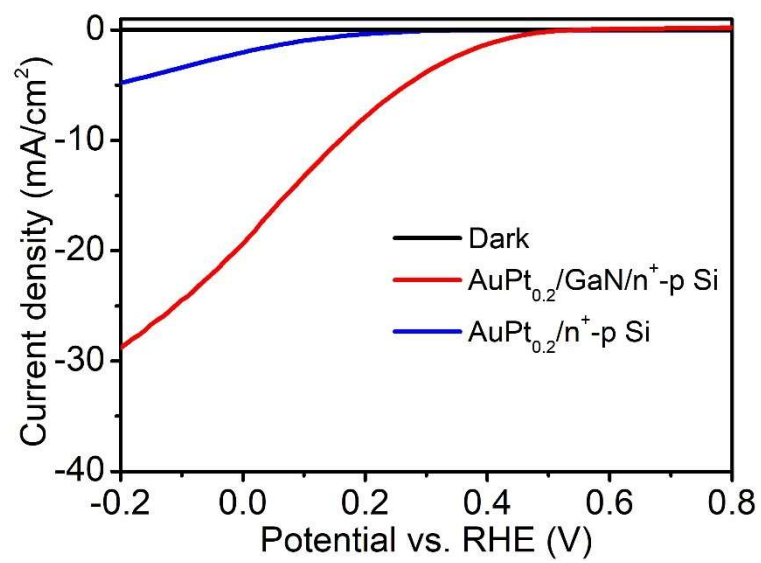

**Figure S12.**  $J$ - $V$  curves of  $\text{AuPt}_{0.2}/\text{n}^+\text{-p Si}$  and  $\text{AuPt}_{0.2}/\text{GaN}/\text{n}^+\text{-p Si}$ . Related to Figure 3.

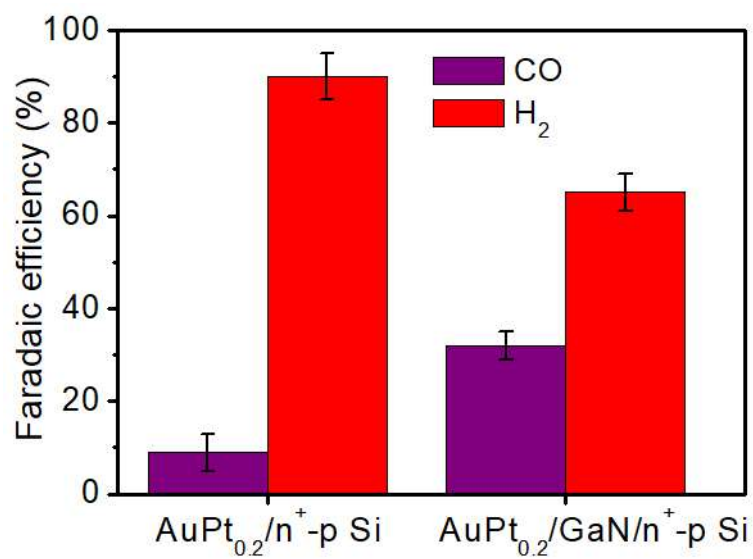

**Figure S13.** FEs for CO (purple bars) and H<sub>2</sub> (red bars) of AuPt<sub>0.2</sub>/n<sup>+</sup>-p Si and AuPt<sub>0.2</sub>/GaN/n<sup>+</sup>-p Si at +0.17 V vs RHE. The low FE for CO on AuPt<sub>0.2</sub>/n<sup>+</sup>-p Si might be ascribed to the close proximity of Au and Pt cocatalysts when they deposited on planar Si substrate. Error bars represent one standard deviation of multiple independent measurements. Related to Figure 3.

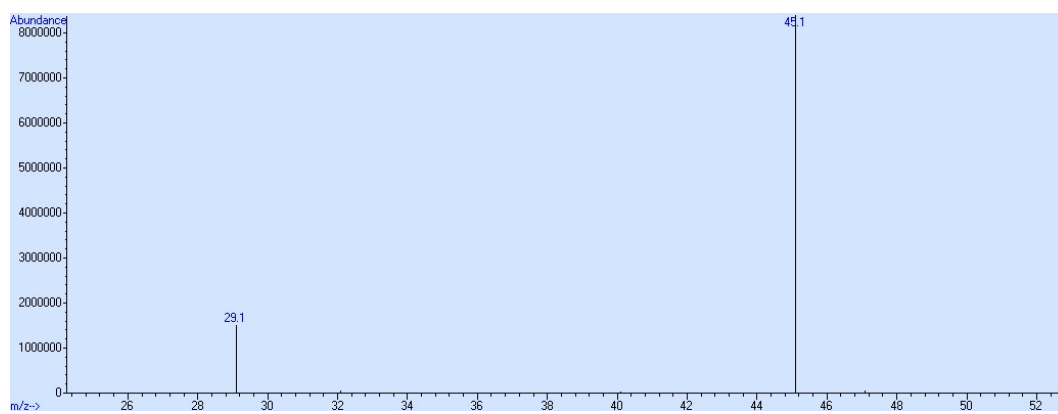

**Figure S14.** Mass spectrometry chromatogram of the gas phase analysis after  $^{13}\text{C}$ -labeled isotope experiment. Related to Figure 3.

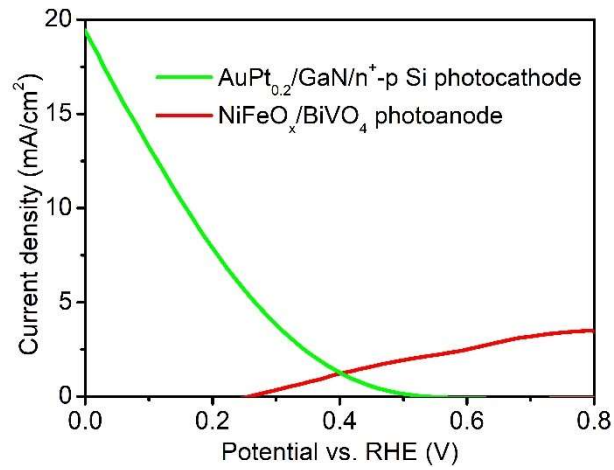

**Figure S15.** *J-V* curves for AuPt<sub>0.2</sub>/GaN/n<sup>+</sup>-p Si (in CO<sub>2</sub>-saturated 0.5 M KHCO<sub>3</sub> aqueous solution) and NiFeO<sub>x</sub>/BiVO<sub>4</sub> photoanode (in 0.5 M KBi) in a three-electrode configuration. The photocathode data was plotted with the sign of the photocurrent inverted. Related to Figure 4.

**Table S1** Contributions to the adsorbate free energy from the corrections of zero-point energy, heat capacity, and entropy, respectively. The assumed fugacity for each non-adsorbed species are also included. H<sub>2</sub> (ref) is used for the computational hydrogen electrode model as described in Computational Methods Section. Related to Figure 1.

| Species              | Fugacity (Pa) | ZPE (eV) | $\int C_p dT$ (eV) | -TS (eV) |
|----------------------|---------------|----------|--------------------|----------|
| *COOH                | -             | 0.62     | 0.10               | -0.27    |
| *CO                  | -             | 0.19     | 0.08               | -0.16    |
| *H                   | -             | 0.16     | 0.01               | -0.01    |
| H <sub>2</sub> (ref) | 101325        | 0.27     | 0.09               | -0.42    |
| CO                   | 101325        | 0.14     | 0.09               | -0.67    |
| H <sub>2</sub> O     | 3534          | 0.58     | 0.10               | -0.65    |
| CO <sub>2</sub>      | 101325        | 0.31     | 0.10               | -0.65    |

**Table S2.** ICP-AES analysis of Au and Pt loading amounts of different samples. Related to Figure 2.

| Sample                      | Au/GaN/<br>n <sup>+</sup> -p Si | AuPt <sub>0.1</sub> /GaN/<br>n <sup>+</sup> -p Si | AuPt <sub>0.2</sub> /GaN/<br>n <sup>+</sup> -p Si | AuPt <sub>0.4</sub> /GaN/<br>n <sup>+</sup> -p Si | Pt/GaN/<br>n <sup>+</sup> -p Si |
|-----------------------------|---------------------------------|---------------------------------------------------|---------------------------------------------------|---------------------------------------------------|---------------------------------|
| Au (nmol cm <sup>-2</sup> ) | 8.5                             | 8.8                                               | 8.5                                               | 8.6                                               | -                               |
| Pt (nmol cm <sup>-2</sup> ) | -                               | 0.9                                               | 1.7                                               | 3.4                                               | 3.7                             |

**Table S3.** Performance comparison of photocathodes for PEC CO<sub>2</sub> reduction into CO/syngas at underpotential (more positive than the equilibrium potential  $E^0(\text{CO}_2/\text{CO}) = -0.11 \text{ V vs RHE}$ ). Related to Figure 3.

| Photocathode                                                           | Light intensity (mW cm <sup>-2</sup> ) | Onset potential (V vs RHE) <sup>[a]</sup> | FE <sub>CO</sub> (%) <sup>[b]</sup> | ABPE (%) <sup>[c]</sup> | Refs              |
|------------------------------------------------------------------------|----------------------------------------|-------------------------------------------|-------------------------------------|-------------------------|-------------------|
| Cu-ZnO/GaN/n <sup>+</sup> -p Si                                        | 800                                    | 0.1                                       | 70                                  | ~0.01                   | Chu et al., 2016  |
| Au <sub>3</sub> Cu/n <sup>+</sup> -p Si                                | 20                                     | 0.15                                      | 80                                  | 0.07                    | Kong et al., 2016 |
| Au/n <sup>+</sup> -p Si                                                | 100                                    | 0.2                                       | 91                                  | 0.12                    | Song et al., 2017 |
| Au/ZnO@ZnTe@CdTe                                                       | 100                                    | 0.45                                      | 67                                  | 0.18                    | Jang et al., 2016 |
| Ag <sub>2</sub> P/Al <sub>2</sub> O <sub>3</sub> /n <sup>+</sup> -p Si | 100                                    | 0.3                                       | 67                                  | 0.3                     | Li et al., 2019   |
| Au/TiO <sub>2</sub> /a-Si                                              | 100                                    | 0.4                                       | 50                                  | 0.42                    | Li et al., 2019   |
| Pt-TiO <sub>2</sub> /GaN/n <sup>+</sup> -p Si                          | 800                                    | 0.5                                       | 78                                  | 0.87                    | Chu et al., 2018  |
| Cu <sub>3</sub> (BTC) <sub>2</sub> /Cu <sub>2</sub> O                  | 100                                    | -1.77 V vs Fc/Fc <sup>+</sup>             | 95                                  | 0.83                    | Deng et al., 2019 |
| <b>AuPt/GaN/n<sup>+</sup>-p Si</b>                                     | <b>100</b>                             | <b>0.45</b>                               | <b>91</b>                           | <b>1.88</b>             | <b>This work</b>  |

<sup>[a]</sup> The potential reported at photocurrent density of 0.5 mA cm<sup>-2</sup>.

<sup>[b]</sup> The highest FE reported in the system.

<sup>[c]</sup> Calculated using equation 7 in Methods Section.



**Table S4.** Performance comparison of recent state-of-the-art catalysts for (photo)electrochemical CO<sub>2</sub> reduction into CO. Related to Figure 3.

| Catalytic architecture                        | Potential                    | TOF (h <sup>-1</sup> ) | Refs.                  |
|-----------------------------------------------|------------------------------|------------------------|------------------------|
| Ag/Si NWs                                     | -1.4 V vs. RHE               | 2400                   | Wei et al., 2019       |
| Single Sb/NC                                  | -0.9 V vs. RHE               | 16600                  | Jia et al., 2019       |
| Single Ni/graphene                            | 2.78 V vs. RHE               | 210000                 | Jiang et al., 2018     |
| Ni <sup>I</sup> -NCNT@Ni <sub>9</sub> Cu      | -0.73 V vs. RHE              | 1962                   | Zhang et al., 2020     |
| NC-CNTs (Ni)                                  | -1.0 V vs. RHE               | 11650                  | Fan et al., 2019       |
| PyNiPc                                        | -0.93 V vs. RHE              | 13000                  | Ma et al., 2020        |
| Cr( <sup>tbu</sup> dhbpy)Cl(H <sub>2</sub> O) | -0.22 V vs. RHE              | 20520                  | Hooe et al., 2019      |
| Fe-TPP-Dimer/CNT                              | -0.88 V vs. RHE              | 36000                  | Abdinejad et al., 2020 |
| <i>meta</i> -Re(bpy)(CO) <sub>3</sub> Cl      | -1.98 V vs. Fc <sup>+0</sup> | 860400                 | Talukdar et al., 2020  |
| AuPt/GaN/n <sup>+</sup> -p Si                 | 0.17 V vs. RHE               | 56400                  | This work              |

## Reference:

Abdinejad, M., Dao, C., Deng, B., Sweeney, M.E., Dielmann, F., Zhang, X., and Kraatz, H.B. (2020). Enhanced electrochemical reduction of CO<sub>2</sub> to CO upon immobilization onto carbon nanotubes using an iron-porphyrin dimer. *ChemistrySelect* 5, 979-984.

Blöchl, P. E. (1994) Projector augmented-wave method. *Phys. Rev. B* 50, 17953.

Chu, S., Fan, S. Z., Wang, Y. J., Rossouw, D., Wang, Y. C., Botton, G. A., and Mi, Z. (2016) Tunable syngas production from CO<sub>2</sub> and H<sub>2</sub>O in an aqueous photoelectrochemical cell. *Angew. Chem. Int. Ed.* 55, 14260-14264.

Chu, S., Ou, P., Ghamari, P., Vanka, S., Zhou, B., Shih, I., Song, J., and Mi, Z. (2018) Photoelectrochemical CO<sub>2</sub> reduction into syngas with the metal/oxide interface. *J. Am. Chem. Soc.* 140, 7869-7877.

Deng, X., Li, R., Wu, S., Wang, L., Hu, J., Ma, J., Jiang, W., Zhang, N., Zheng, X., Gao, C., Wang, L., Zhang, Q., Zhu, J., and Xiong, Y. (2019) Metal-organic framework coating enhances the performance of Cu<sub>2</sub>O in photoelectrochemical CO<sub>2</sub> reduction. *J. Am. Chem. Soc.* 141, 10924-10929.

Fan, Q., Hou, P., Choi, C., Wu, T.S., Hong, S., Li, F., Soo, Y.L., Kang, P., Jung, Y., and Sun, Z. (2019). Activation of Ni particles into single Ni-N atoms for efficient electrochemical reduction of CO<sub>2</sub>. *Adv. Energy Mater.* 10, 1903068.

Hooe, S.L., Dressel, J.M., Dickie, D.A., and Machan, C.W. (2019). Highly efficient electrocatalytic reduction of CO<sub>2</sub> to CO by a molecular chromium complex. *ACS Catal.* 10, 1146-1151.

Jang, Y. J., Jeong, I., Lee, J., Lee, J., Ko, M. J., Lee, J. S. Unbiased sunlight-driven artificial photosynthesis of carbon monoxide from CO<sub>2</sub> using a ZnTe-based photocathode and a perovskite solar cell in tandem. *ACS Nano* **2016**, *10*, 6980.

Jia, M., Hong, S., Wu, T.-S., Li, X., Soo, Y.-L., and Sun, Z. (2019). Single Sb sites for efficient electrochemical CO<sub>2</sub> reduction. *Chem. Commun.* *55*, 12024-12027.

Jiang, K., Siahrostami, S., Zheng, T., Hu, Y., Hwang, S., Stavitski, E., Peng, Y., Dynes, J., Gangisetty, M., Su, D., *et al.* (2018). Isolated Ni single atoms in graphene nanosheets for high-performance CO<sub>2</sub> reduction. *Energy Environ. Sci.* *11*, 893-903.

Kim, T.W., and Choi, K.S. (2014). Nanoporous BiVO<sub>4</sub> photoanodes with dual-layer oxygen evolution catalysts for solar water splitting. *Science* *343*, 990-994.

Kobayashi, H., Sato, N., Orita, M., Kuang, Y., Kaneko, H., Minegishi, T., Yamada, T., and Domen, K. (2018). Development of highly efficient CuIn<sub>0.5</sub>Ga<sub>0.5</sub>Se<sub>2</sub>-based photocathode and application to overall solar driven water splitting. *Energy Environ. Sci.* *11*, 3003-3009.

Kong, Q., Kim, D., Liu, C., Yu, Y., Su, Y., Li, Y., and Yang, P. D. (2016) Directed assembly of nanoparticle catalysts on nanowire photoelectrodes for photoelectrochemical CO<sub>2</sub> reduction. *Nano Lett.* *16*, 5675-5680.

Kresse, G., and Furthmüller, J. (1996) Efficiency of ab-initio total energy calculations for metals and semiconductors using a plane-wave basis set. *Comput. Mater. Sci.* *6*, 15.

Kresse, G., and Hafner, J. (1994) Ab initio molecular-dynamics simulation of the liquid-metal–amorphous-semiconductor transition in germanium. *Phys. Rev. B* *49*, 14251.

Kresse, G., and Joubert, D. (1999) From ultrasoft pseudopotentials to the projector augmented-

wave method. *Phys. Rev. B* *59*, 1758.

Li, C. C., Wang, T., Liu, B., Chen, M. X., Li, A., Zhang, G., Du, M. Y., Wang, H., Liu, S. F., and Gong, J. L. (2019) Photoelectrochemical CO<sub>2</sub> reduction to adjustable syngas on grain-boundary-mediated a-Si/TiO<sub>2</sub>/Au photocathodes with low onset potentials. *Energy Environ. Sci.* *12*, 923-928.

Li, H., Wen, P., Itanze, D. S., Hood, Z. D., Ma, X., Kim, M., Adhikari, S., Lu, C., Dun, C., Chi, M., et al. (2019) Colloidal silver diphosphide (AgP<sub>2</sub>) nanocrystals as low overpotential catalysts for CO<sub>2</sub> reduction to tunable syngas. *Nat. Commun.* *10*, 5724.

Li, L., Mu, X., Liu, W., Kong, X., Fan, S., Mi, Z., and Li, C. (2014) Thermal non-oxidative aromatization of light alkanes catalyzed by gallium nitride. *Angew. Chem. Int. Ed.* *53*, 14106.

Ma, D.-D., Han, S.-G., Cao, C., Li, X., Wu, X.-T., and Zhu, Q.-L. (2020). Remarkable electrocatalytic CO<sub>2</sub> reduction with ultrahigh CO/H<sub>2</sub> ratio over single-molecularly immobilized pyrrolidinonyl nickel phthalocyanine. *Appl. Catal. B* *264*, 118530.

Monkhorst, H. J., and Pack, J. D. (1976) Special points for brillouin-zone integrations. *Phys. Rev. B* *13*, 5188.

Nørskov, J. K., Rossmeisl, J., Logadottir, A., Lindqvist, L., Kitchin, J. R., Bligaard, T., and Jønsson, H. (2004) Origin of the overpotential for oxygen reduction at a fuel-cell cathode. *J. Phys. Chem. B* *108*, 17886.

Sheng, W., Kattel, S., Yao, S., Yan, B., Liang, Z., Hawxhurst, C. J., Wu, Q., and Chen, J. G. (2017) Electrochemical reduction of CO<sub>2</sub> to synthesis gas with controlled CO/H<sub>2</sub> ratios. *Energy Environ. Sci.* *10*, 1180.

Song, J. T., Ryoo, H., Cho, M., Kim, J., Kim, J. G., Chung, S. Y., and Oh, J. (2017) Nanoporous Au Thin Films on Si Photoelectrodes for Selective and Efficient Photoelectrochemical CO<sub>2</sub> Reduction. *Adv. Energy Mater.* 7, 1601103.

Sui, M., Li, M. Y., Kim, E. S., and Lee, J. (2013) Annealing temperature effect on self-assembled Au droplets on Si (111). *Nanoscale Res. Lett.* 8, 525.

Talukdar, K., Sinha Roy, S., Amatya, E., Sleeper, E.A., Le Magueres, P., and Jurss, J.W. (2020). Enhanced electrochemical CO<sub>2</sub> Reduction by a series of molecular rhenium catalysts decorated with second-sphere hydrogen-bond donors. *Inorg. Chem.* 59, 6087-6099.

Tripković, V., Skúlason, E., Siahrostami, S., Nørskov, J. K., and Rossmeisl, J. (2010) The oxygen reduction reaction mechanism on Pt(111) from density functional theory calculations. *Electrochim. Acta* 55, 7975.

Vanka, S., Arca, E., Cheng, S., Sun, K., Botton, G. A., Teeter, G., and Mi, Z. (2018) High efficiency Si photocathode protected by multifunctional GaN nanostructures. *Nano Lett.* 18, 6530.

Wei, L., Lin, J., Xie, S., Ma, W., Zhang, Q., Shen, Z., and Wang, Y. (2019). Photoelectrocatalytic reduction of CO<sub>2</sub> to syngas over Ag nanoparticle modified p-Si nanowire arrays. *Nanoscale* 11, 12530-12536.

Wellendorff, J., Lundgaard, K. T., Møgelhøj, A., Petzold, V., Landis, D. D., Nørskov, J. K., Bligaard, T., and Jacobsen, K. W. (2012) Density functionals for surface science: Exchange-correlation model development with bayesian error estimation. *Phys. Rev. B* 85, 235149.

Zhang, T., Han, X., Yang, H., Han, A., Hu, E., Li, Y., Yang, X.q., Wang, L., Liu, J., and Liu, B. (2020). Atomically dispersed nickel(I) on an alloy-encapsulated nitrogen-doped carbon

nanotube array for high-performance electrochemical CO<sub>2</sub> reduction reaction. *Angew. Chem. Int. Ed.* doi.org/10.1002/anie.202002984.
